# Supplementary material for: Rapidity of CNS Effect on Photoparoxysmal Response for Brivaracetam vs. Levetiracetam: A Randomized, Double-blind, Crossover Trial in Photosensitive Epilepsy Patients
Source: PubMed Central journal article supplement — CNS Drugs. 2020 Sep 19;34(10):1075–86. doi: 10.1007/s40263-020-00761-1 (PMC7518996; doi:10.1007/s40263-020-00761-1), 2020-09-19
Supplement: 40263_2020_761_MOESM1_ESM.pdf [file 40263_2020_761_MOESM1_ESM.pdf]

## **Rapidity of CNS Effect on Photoparoxysmal Response for Brivaracetam vs Levetiracetam: A Randomized, Double-blind, Crossover Trial in Photosensitive Epilepsy Patients**

Ronald C. Reed<sup>1</sup>, William E. Rosenfeld<sup>2</sup>, Susan M. Lippmann<sup>2</sup>, Rene M.J.C. Eijkemans<sup>3</sup>, and Dorothee' G.A. Kasteleijn-Nolst Trenité<sup>4,5</sup>

<sup>1</sup>West Virginia University, School of Pharmacy, Dept. of Clinical Pharmacy, Morgantown, WV, USA

<sup>2</sup>Comprehensive Epilepsy Care Center for Children and Adults, St. Louis, MO, USA

<sup>3</sup>Head of Biostatistics & Research Support, Julius Center for Health Sciences and Primary Care, Utrecht University, The Netherlands

<sup>4</sup>Department of Neurosurgery and Epilepsy, University Medical Center, Utrecht University, The Netherlands

<sup>5</sup>Nesmos Department, Faculty of Medicine and Psychology, Sapienza University, Rome, Italy

### **Corresponding Author:**

Ronald C. Reed, BS Pharm, PharmD, FCCP, FAES

Professor and Arthur I. Jackowitz Endowed Chair

Associate Chair, Clinical Research & Innovation

Dept. of Clinical Pharmacy, School of Pharmacy, West Virginia University

1124 Health Science Center North

Morgantown, West Virginia 26506-9520

Email: [ronald.reed@hsc.wvu.edu](mailto:ronald.reed@hsc.wvu.edu)

## Supplementary Materials

Figures and Tables appear in the order presented in the manuscript text.

### Supplementary Figure 1: Study Design Flow Chart, Parts 1 & 2<sup>a</sup>

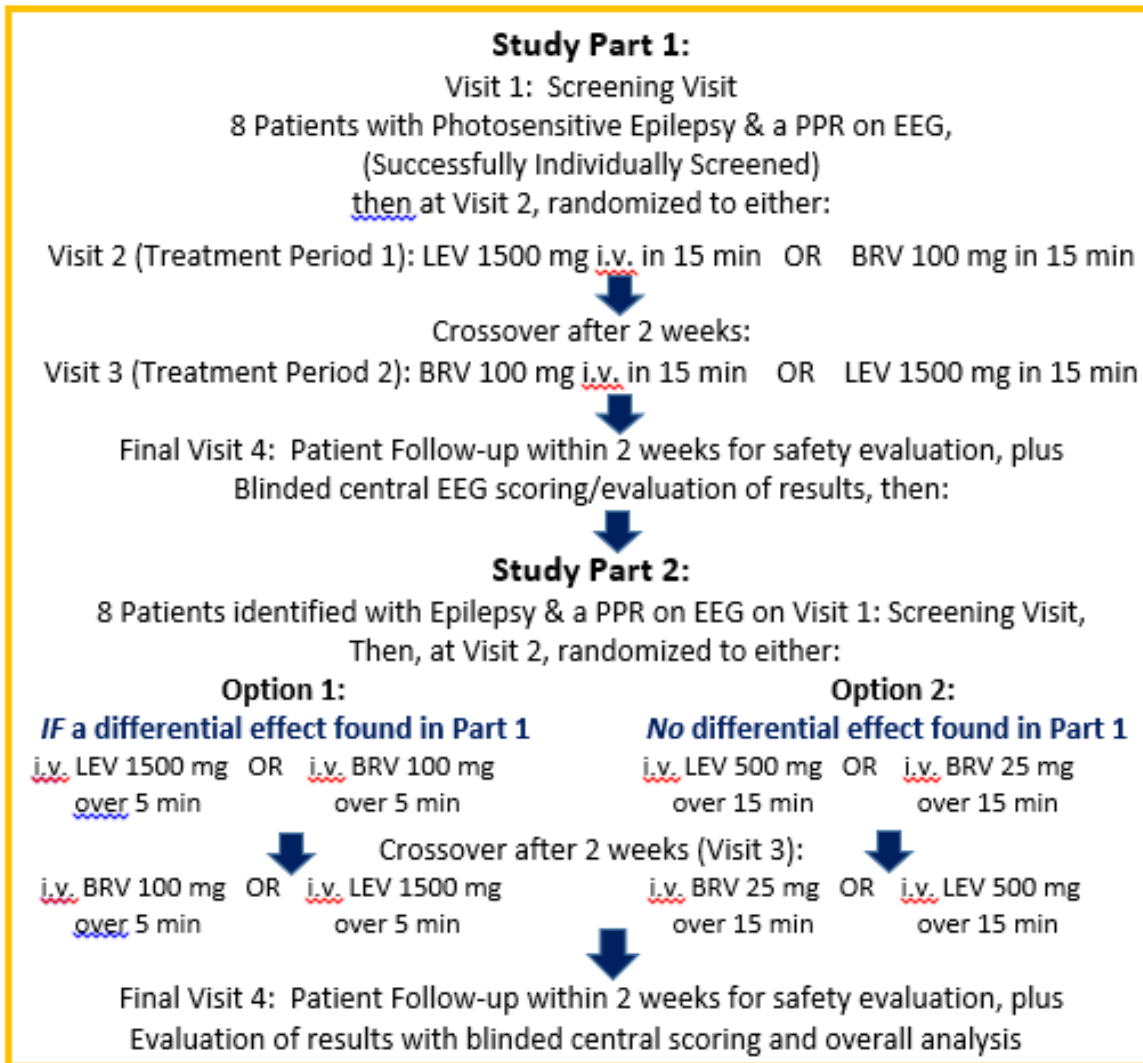

<sup>a</sup> The reader is referred to ‘Expanded Descriptions of Select Items from Manuscript Text, Methods, 2.1 Protocol’ for more information regarding the only patient (blinding code AAA) who was placed into Option 2, Part 2.



**Supplementary Table 2: Physical & Clinical Characteristics, including Seizure Types, Co-morbidities, Concomitant ASMs with Total Daily milligram Dose, plus EEG PPR Baseline Conditions, for All Patients**

| <b>Patient:</b>                                  | <b>AAA</b>                                     | <b>BBB</b>                                                    | <b>CCC</b>                                | <b>GGG</b>            | <b>HHH</b>               | <b>KKK</b>                                                       | <b>NNN</b>           | <b>OOO<sup>a</sup></b> | <b>PPP<sup>a</sup></b>                          |                      |
|--------------------------------------------------|------------------------------------------------|---------------------------------------------------------------|-------------------------------------------|-----------------------|--------------------------|------------------------------------------------------------------|----------------------|------------------------|-------------------------------------------------|----------------------|
| Sex                                              | M                                              | M                                                             | M                                         | F                     | F                        | F                                                                | F                    | F                      | F                                               |                      |
| Age (yr) at Study Start                          | 34                                             | 34                                                            | 25                                        | 23                    | 36                       | 36                                                               | 38                   | 18                     | 42                                              |                      |
| Wgt (kg) <sup>b</sup>                            | 82.4                                           | 84.8                                                          | 63.6                                      | 82.4                  | 74.3                     | 108.6                                                            | 52.2                 | 85.9                   | 105.6                                           |                      |
| Co-ASM(s) Generic Name & Total mg Daily Dose     | LTG-XR: 800<br>LZP: 1 (prn)                    | VPA-ER: 1750<br>LCM: 400<br>ZNS: 400<br>CBD: 1.32 (in Part 2) | ZNS: 600<br>LCM: 500<br>PER: 8<br>CBD: 33 | ZNS: 400<br>LTG: 450  | LTG: 700                 | TPM: 400                                                         | none                 | none                   | VPA: 500<br>PGB: 150                            |                      |
| Seizure (Sz) types                               | GTC,<br>MYO<br>ABS<br>drop attacks             | GTC<br>MYO<br>ABS<br>drop attacks                             | GTC<br>MYO<br>ABS                         | GTC<br>MYO<br>ABS     | MYO<br>ABS               | GTC<br>MYO<br>ABS                                                | GTC<br>MYO<br>ABS    | GTC<br>MYO<br>ABS      | GTC<br>MYO                                      |                      |
| Visually induced szs / type                      | Yes:<br>GTC<br>MYO                             | Yes:<br>MYO                                                   | Yes:<br>MYO                               | Yes:<br>GTC<br>MYO    | Yes:<br>MYO              | Yes:<br>GTC<br>MYO                                               | Yes:<br>MYO          | Yes:<br>GTC<br>MYO     | Yes:<br>MYO                                     |                      |
| Sz Frequency previous 6 months                   | GTC:1-2/mo<br>MYO:qd<br>ABS:infreq<br>Drops:qd | MYO: periodic<br>ABS: qd<br>Drops:1/yr                        | GTC:2/mo                                  | GTC:2/6 mo<br>MYO: qd | MYO: occas               | MYO: occas                                                       | MYO: occas           | None                   | MYO: occasional, if tired, with flashing lights |                      |
| Epilepsy type                                    | 1° gen                                         | 1° gen                                                        | 1° gen                                    | 1° gen                | 1° gen                   | 1° gen                                                           | 1° gen               | 1° gen                 | 1° gen                                          |                      |
| Co-morbidities                                   | ADD                                            | No                                                            | No                                        | ADD                   | Cervical cancer, SLE, DM | Mild dev delay, Hx colon/thyroid Ca, hyperlipidemia, fatty liver | No                   | Anx, Dep               | Obesity, Gastric sleeve, AODM                   |                      |
| Neurological exam                                | wnl                                            | wnl                                                           | wnl                                       | wnl                   | wnl                      | Abn <sup>c</sup>                                                 | wnl                  | wnl                    | wnl                                             |                      |
| <b>EEG PPR Baseline Conditions<sup>d,e</sup></b> |                                                |                                                               |                                           |                       |                          |                                                                  |                      |                        |                                                 |                      |
| Part 1 <sup>f</sup> PPR (Hz)                     | V2<br>60                                       | V3<br>20 <sup>g</sup>                                         | V2<br>60                                  | V3<br>40              | V2<br>60                 | V3<br>40                                                         | V2<br>25             | V3<br>25               | V2<br>30                                        | V3<br>30             |
| Part 1 Eye condition                             | V2<br>during closure                           | V3<br>during closure                                          | V2<br>during closure                      | V3<br>during closure  | V2<br>during closure     | V3<br>during closure                                             | V2<br>during closure | V3<br>during closure   | V2<br>during closure                            | V3<br>during closure |
| Part 2 <sup>f</sup> PPR (Hz)                     | V2<br>50 <sup>h</sup>                          | V3<br>18 <sup>h</sup>                                         | V2<br>50                                  | V3<br>40              | V2<br>20                 | V3<br>30                                                         | V2<br>25             | V3<br>20               | V2<br>50                                        | V3<br>40             |
| Part 2                                           | closure                                        | closed                                                        | during                                    | closed                | during                   | during                                                           | during               | during                 | ---                                             | during               |

## CNS Drugs

|        |    |         |         |         |         |         |         |         |     |         |
|--------|----|---------|---------|---------|---------|---------|---------|---------|-----|---------|
| Eye    | V2 |         |         | closure |         | closure | closure | closure |     | closure |
| condi- |    | closure | during  | during  | during  | during  | during  | during  | --- | during  |
| tion   | V3 |         | closure | closure | closure | closure | closure | closure |     | closure |

*Abbreviations used:* M = male, F = female, Hgt = height, Wgt = weight; BMI = body mass index; Co-ASMs = concomitant Anti-Seizure Medicines (ASMs); Sz = seizure; wnl = within normal limits; Abn = abnormal; LTG = lamotrigine, LTG-XR = lamotrigine extended-release, LZP = lorazepam, VPA-ER = valproic acid extended-release, LCM = lacosamide, ZNS = zonisamide, CBD = cannabidiol, PER = perampanel, TPM = topiramate, PGB = pregabalin; GTC = generalized tonic-clonic seizure; MYO = myoclonic; ABS = absence; Drops = drop attacks; 1° gen = Primary generalized; mo. = month, qd = daily, occas = occasionally; ADD = attention deficit disorder; SLE = systemic lupus erythematosus, DM = diabetes mellitus; AODM = adult onset DM; Ca = cancer, de = developmental; Anx = anxiety; dep = depression.

- <sup>a</sup> Patient OOO only participated in Part 1; patient PPP only in Part 2.
- <sup>b</sup> Weight was only calculated for each patient at the Screening Visit, V1, in Part 1 and at Screening V1, Part 2, for PPP.
- <sup>c</sup> Abn = Abnormal neurological exam for Patient KKK, at baseline, included mild cognitive dysfunction, moderate tremor and mild wide-based gait.
- <sup>d</sup> IPS was performed by the neurologist/epileptologist (WER), with the EEG technologist assistance, for 5 sec or less with 5 sec intervals at 0 (baseline), 1, 2, 5, 10, 15, 20, 30, 60 and 120 minutes from start of intravenous ASM administration. Counting of the 5-second intervals was performed out-loud by neurologist/epileptologist (SML), assisted with a metronome. Procedures and observations for PPR were continuously followed on video EEG screen on a Nihon Kohden digital machine. The lamp was placed 11 inches from the nasion. Patients were checked for spontaneous epileptiform discharges (2.5 minutes EEG with eyes open and 2.5 minutes with eyes closed) at baseline. Patients were continuously observed clinically.
- <sup>e</sup> Prior to any patient recruitment, the entire investigative team performed a multiple-hour simulation of photic stimulation, EEG recording, and blood sampling/processing on a staff volunteer until the protocol-defined precise timing of the procedures was performed efficiently and correctly.
- <sup>f</sup> Upper limit threshold starting point (determined at baseline).
- <sup>g</sup> Patient AAA's testing started 3 hrs post-GTCS.
- <sup>h</sup> AAA received lower mg dose at the same infusion rate in Part 2 (Protocol Option 2).

**Supplementary Table 3: Concomitant ASM Plasma Concentrations [ASM, mg/L]<sup>a</sup> for Participating Patients, AAA through GGG**

| Patient:                           | AAA               | BBB                                           |                                     | CCC                           |                  | GGG                          |                   |
|------------------------------------|-------------------|-----------------------------------------------|-------------------------------------|-------------------------------|------------------|------------------------------|-------------------|
| Co-AED(s)                          | LTG-XR:           | VPA-ER: 1750                                  |                                     | ZNS: 600                      |                  | ZNS: 400                     |                   |
| Generic Name & Total mg Daily Dose | 800 LZP: 1 (prn)  | LCM: 400<br>ZNS: 400<br>CBD: 1.32 (in Part 2) |                                     | LCM: 500<br>PER: 8<br>CBD: 33 |                  | LTG: 450                     |                   |
| Date:                              | 06-01-18          | 06-01-18                                      |                                     | 06-06-18                      |                  | 06-26-18                     |                   |
| AAA Date,Part 1 time,visit #       | [LTG]             | BBB Date,Part 1 time,visit #                  | [VPA] [LCM]                         | CCC Date,Part 1 time,visit #  | [LCM]            | GGG Date,Part 1 time,visit # | [LTG]             |
| 06-01-18, 08:43, V1                | 8.5               | 06-01-18, 12:38p, V1                          | 118.2 9.6                           | 06-06-18, 11:00, V1           | n.d.             | 06-26-18, 15:27p, V1         | 10.0              |
| 06-02-18, 08:12, V2                | 5.1               | 06-05-18, 14:09p, V2                          | 105.5 <sup>b</sup> 9.2 <sup>b</sup> | 06-11-18, V2                  | ---              | 07-10-18, 09:10, V2          | 9.3               |
| 06-19-18, 08:08, V3                | 14.3              | 06-21-18, 08:11, V3                           | 95.0 9.7                            | 06-25-18, 09:09, V3           | 2.1              | 07-10-18, 12:11p, V2         | 9.6 <sup>b</sup>  |
| 06-19-18, 10:58, V3                | 9.4 <sup>b</sup>  | 06-21-18, 11:12, V3                           | 88.4 <sup>b</sup> 9.1 <sup>b</sup>  | 06-25-18, 12:35p, V3          | 2.0 <sup>b</sup> | 07-31-18, 09:15, V3          | 8.9               |
| 06-19-18, 12:52p, V3               | 14.9 <sup>b</sup> | -                                             | -                                   |                               |                  | 07-31-18, 11:58, V3          | 10.8 <sup>b</sup> |
| AAA Date,Part 2 time,visit #       | [LTG]             | BBB Date,Part 2 time,visit #                  | [VPA] [LCM]                         | CCC Date,Part 2 time,visit #  | [LCM]            | GGG Date,Part 2 time,visit # | [LTG]             |
| 11-08-18, 09:09, V2                | 14.9              | 12-05-18, 09:14, V2                           | 97.7 13.8                           | 11-06-18, 09:05, V2           | 6.3              | 11-26-18, 18:39p, V2         | 9.0               |
| 11-08-18, 13:01p, V2               | 18.0              | 12-05-18, 11:57, V2                           | 90.1 <sup>b</sup> 12.5 <sup>b</sup> | 11-20-18, 09:00, V3           | 3.0              | 12-12-18, 14:05, V3          | 9.8               |
| 11-28-18, 08:32, V3                | 9.4               | 12-19-18, 09:27, V3                           | 110.0 10.5                          | 11-20-18, 11:45, V3           | 2.7 <sup>b</sup> | 12-12-18, 16:46p, V3         | 8.1 <sup>b</sup>  |
| 11-28-18, 10:58, V3                | 9.4               | 12-19-18, 12:51p, V3                          | 92.3 <sup>b</sup> 9.6 <sup>b</sup>  |                               |                  |                              |                   |

Abbreviations used: LTG = lamotrigine, LEV = levetiracetam, BRV = brivaracetam, LTG-XR = lamotrigine extended-release, LZP = lorazepam, VPA-ER = valproic acid extended-release, LCM = lacosamide, ZNS = zonisamide, CBD = cannabidiol, PER = perampanel, TPM = topiramate, PGB = pregabalin, n.d. not detected.

<sup>a</sup> All Plasma [ASM] concentration measurements are given as mg/L = mcg/ml. Samples for [ASMs] were taken where assays for clinical care existed commercially, including LTG, VPA, LCM and TPM. Plasma concentrations were not taken, nor available for: LZP, ZNS, CBD, PER and PGB.

<sup>b</sup> Plasma [ASM] result obtained at 2 hrs post-start of LEV or BRV intravenous.

**Supplementary Table 3 (con't): Concomitant ASM Plasma Concentrations [ASM, mg/L]<sup>a</sup> for Participating Patients, HHH through PPP**

| Patient:                                    | HHH              | KKK                                         | NNN                                          | OOO      | PPP                                              |
|---------------------------------------------|------------------|---------------------------------------------|----------------------------------------------|----------|--------------------------------------------------|
| Co-AED(s)                                   |                  |                                             |                                              |          |                                                  |
| Generic Name & Total mg Daily Dose          | LTG: 700         | TPM: 400                                    | None                                         | None     | VPA: 500<br>PGB: 150                             |
| Date:                                       | 06-26-18         | 09-05-18                                    | 09-17-18                                     | 09-20-18 | 11-19-18                                         |
| HHH<br>Date, <u>Part 1</u><br>time, visit # | [LTG]            | KKK<br>Date, <u>Part 1</u><br>time, visit # | [TPM]                                        |          |                                                  |
| 06-26-18,<br>18:03p, V1                     | 4.8              | 09-05-18,<br>11:56, V1                      | 8.6                                          |          |                                                  |
| 07-09-18,<br>17:00, V2                      | 3.9              | 09-06-18,<br>09:10, V2                      | 8.9                                          |          |                                                  |
| 07-09-18,<br>19:46p, V2                     | 3.7              | 09-06-18,<br>12:44p, V2                     | 9.5 <sup>b</sup>                             |          |                                                  |
|                                             |                  |                                             | 2 hr post-start<br>intravenous LEV<br>or BRV |          |                                                  |
| 07-30-18,<br>17:12p, V3                     | 6.9              | 09-20-18,<br>08:58, V3                      | 10.5                                         |          |                                                  |
| 07-30-18,<br>19:58p, V3                     | 8.6 <sup>b</sup> | 09-20-18,<br>12:53p, V3                     | 8.7 <sup>b</sup>                             |          |                                                  |
| Date, <u>Part 2</u><br>time, visit #        | [LTG]            | Date, <u>Part 2</u><br>time, visit #        | [TPM]                                        |          | PPP<br>[VPA]                                     |
| 11-06-18,<br>17:29p, V2                     | 4.0              | 12-05-18,<br>14:58p, V2                     | 8.1                                          |          | For PPP,<br>Date, <u>Part 2</u><br>time, visit # |
| 11-06-18,<br>20:08p, V2                     | 3.8              | 12-05-18,<br>17:57, V2                      | 8.0 <sup>b</sup>                             |          | 11-19-18,<br>18:12p, V1                          |
| 11-20-18,<br>17:25p, V3                     | 4.7              | 12-19-18,<br>15:34, V3                      | 16.5                                         |          | 11-26-18,<br>09:29, V2                           |
| 11-20-18,<br>19:59p, V3                     | 4.4              | 12-19-18,<br>18:51p, V3                     | 13.4 <sup>b</sup>                            |          | 12-12-18,<br>09:10, V3                           |
|                                             |                  |                                             |                                              |          | 25.8                                             |

*Abbreviations used:* LTG = lamotrigine, LEV = levetiracetam, BRV = brivaracetam, LTG-XR = lamotrigine extended-release, LZP = lorazepam, VPA-ER = valproic acid extended-release, LCM = lacosamide, ZNS = zonisamide, CBD = cannabidiol, PER = perampanel, TPM = topiramate, PGB = pregabalin, n.d. not detected.

<sup>a</sup> All Plasma [AED] concentration measurements are given as mcg/ml. Samples for [AEDs] were taken where assays for clinical care existed commercially, including LTG, VPA, LCM and TPM. Plasma concentrations were not taken, nor available for: LZP, ZNS, CBD, PER and PGB.

<sup>b</sup> Plasma [AED] result obtained 2 hrs post-start of intravenous LEV or BRV.

**Supplementary Figure 2: Example of a select patient's EEG-  
(patient 'HHH', 07-30-18, Part 1, at 20 Hz)**

**Panel 'A': depicts a generalized PPR at baseline time-zero (blue arrow)**

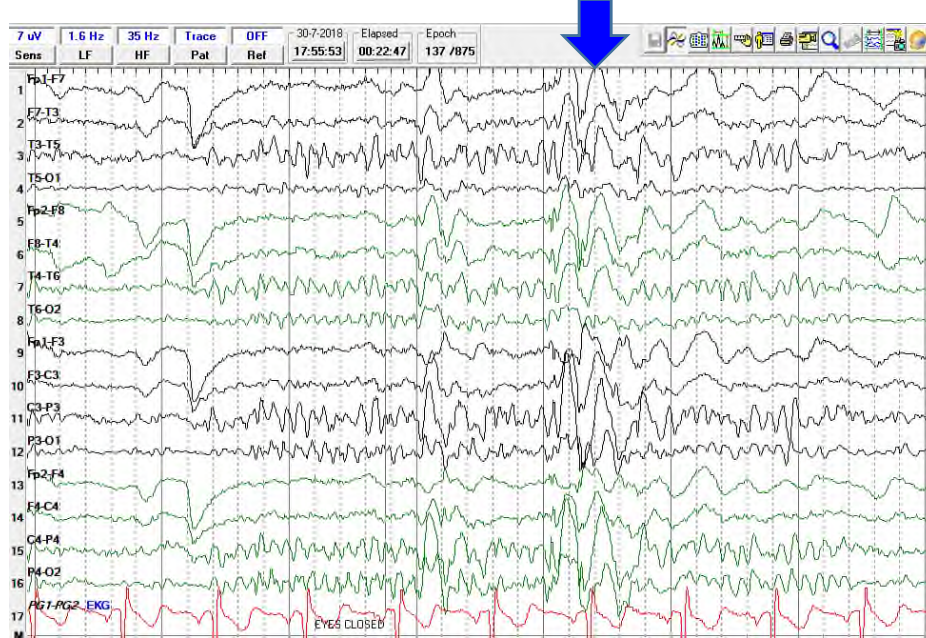

**Panel 'B': PPR abolition in 'HHH' occurring at 1-min after the start of a 15-min i.v. BRV infusion.**

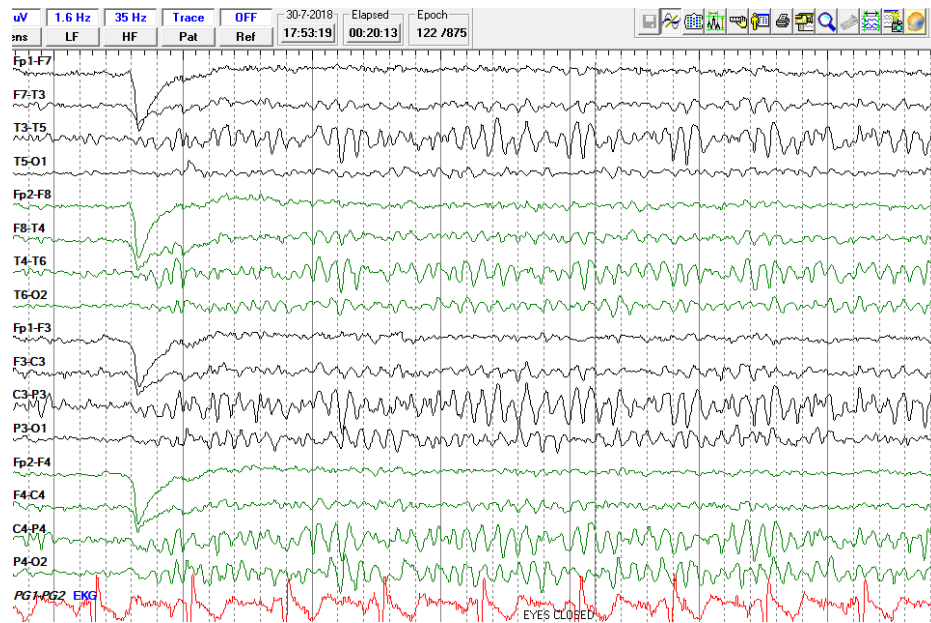

**Note: Complete PPR suppression continued for 'HHH' at 20 min. post-start of an i.v. infusion (EEG segment not shown, since it looks**



similar to panel ‘B’).

## Expanded Descriptions of Select Items from Manuscript Text

### Methods

#### 2.1 Protocol

We conducted a prospective, computer-randomized, double-blind, two-period crossover study at a single site in patients with identified photosensitive epilepsy. Our protocol (**Supplementary Fig. 1**, Study Design Flow Chart) had two Parts: i. Part 1, a single i.v. infusion of LEV 1,500 mg OR an equipotent mg dose of i.v. BRV 100 mg, administered *over 15 minutes* (eight patients, crossed-over to the other treatment arm no earlier than one week later); ii. Part 2 (Option 1), the same single, fixed mg dose of LEV and BRV, as in Part 1, given on separate occasions, randomly, by i.v. infusion *over 5 minutes*. However, Part 2 had two options: patients entered Part 2-Option 1 if they had a *different* time to EEG response to ASM administration on the two occasions in Part 1 (study blind was maintained); patients entered Part 2, Option 2, if they had *no differential* response to the two ASMs in Part 1. In Option 2, a reduced dose of LEV=500 mg (1/3<sup>rd</sup> of that given in Part 1) and equivalent dose of BRV=25 mg (1/4<sup>th</sup> of that given in Part 1) was administered i.v. over 15 minutes. We surmised that a lower mg LEV or BRV dose might be able to “tease out” a differential effect between the time to peak EEG effect for the two ASMs, if it existed, if no difference in time to effect on EEG had been detected between LEV and BRV in Part 1. Our protocol had a mandatory 14-day washout period between Visit 2 and Visit 3. The same patients participating in Part 1 were allowed to enter Part 2, but each patient had to wait a minimum of two weeks after their last drug infusion (*i.e.*, >14 days post-Part 1, Visit 3 (2<sup>nd</sup> ASM infusion) before entering Part 2, Visit 2 (1<sup>st</sup> ASM infusion). Part 1 and Part 2 each had two treatment periods, as per the balanced-crossover design, with four patients randomized either to BRV first, then to LEV (or four patients to LEV first, then to BRV). For both Parts, Visits #2 and #3 were separated by a mandatory 14-days to allow for an adequate ASM washout period. Our protocol and concordant consent forms (one each, Parts 1&2) were approved for the site by Schulman & Associates IRB on 04-27-18, according to the Declaration of Helsinki. The schedule/flowchart for all procedures / events required for patients in our study protocol can be seen in **Supplementary Table 1**.

#### LEV/BRV intravenous injection preparation/administration

All staff were blinded to LEV/BRV randomization except for RCR plus the unblinded physician-SML-who prepared the injections of assigned ASMs (SML maintained blinding sequence via sealed envelope, marked-SML-only-access, in a locked safe). Commercial LEV/BRV was admixed with 0.9% normal saline per package insert. Levetiracetam ([Keppra®], containing 500 mg/5 ml, single-unit vials x3) were removed

## **CNS Drugs**

by syringe and placed into a 100ml intravenous sodium chloride bag (0.9%NaCl, 115ml). Brivaracetam [Briviact®], 50 mg/5 ml, single-unit vials x2) were removed by syringe, placed into a 100ml intravenous 0.9%NaCl bag, plus an additional 5 ml (unit-dose) 0.9%NaCl, so that equivalent fluid was present in each bag (115 ml), allowing for blinding. The medication was administered with a Baxter-6201 intravenous pump, delivering up to 1,999 ml/hr. For the 15-min. infusion rate (Part 1), only one patient, AAA, displayed a BRV:LEV time ratio for PPR abolition = 1, *i.e.*, no difference between LEV and BRV. AAA volunteered for Part 2. Thus, according to protocol, he was placed into Option 2, receiving a lower dosage of LEV or BRV over 15 min. The following procedure was followed: 500 mg LEV (5 ml/vial x1) along with 10ml 0.9%NaCl was added to 100ml of 0.9%NaCl (115ml total) and administered over 15 min (460 ml/hr). For BRV, 25 mg/2.5 ml (½ vial) along with 12.5 ml of 0.9%NaCl was added to 100ml of 0.9%NaCl (115ml total) and administered over 15 min (460 ml/hr) – again, so as to maintain the blind. The medication was administered with a Baxter 6201 intravenous pump, delivering up to 1,999 mls/hr.

### **Blood sample acquisition**

Prior to starting IPS, 18-gauge indwelling catheters were placed into an antecubital vein (one, each arm). One catheter was used for administration of intravenous LEV or BRV; the contralateral arm for blood sample acquisition. For each protocol-designated sampling time, 0.5-1.0 ml blood was initially drawn via syringe and discarded; the next 4 mls were collected in a green-top lithium-heparin tube, then immediately centrifuged at room temperature. Harvested plasma was placed into appropriately-labelled, patient de-identified polypropylene tubes and frozen at an average of  $\leq -20$  degrees Celsius until analysis. Prior to starting IPS, 18-gauge indwelling catheters were placed into an antecubital vein (one, each arm). One catheter was used for administration of i.v. LEV or BRV; the contralateral arm for blood sample acquisition. Multiple blood samples for LEV, BRV determination were obtained concurrent with IPS testing.

### **Plasma [LEV] and [BRV] concentration analysis**

Liquid chromatography-mass spectrometry/mass spectrometry was used for determining plasma [LEV] and [BRV] concentrations. The internal standards for this proprietary methodology were deuterated levetiracetam (LEV-d6) and brivaracetam-2H5. All LEV samples were run in-batch by ClinLab, Inc. (763 S New Ballas Rd #160, St. Louis, MO 63141). The lower limit of LEV detection (LLoD) was 1.0 mcg/ml, with a % coefficient of variation (%CV) = 10% at LLoD; 6.9% at the upper LoD; the intra-day assay %CV = 8%. All BRV samples were run in-batch by NMS Labs (200 Welsh Rd, Horsham, PA 19044). The LLoD was 0.1 mcg/ml (=100 nanog/ml, ng/ml), with a 3.1% within-day %CV.
